# Supplementary material for: VO2(B)@carbon fiber sheet as a binder-free flexible cathode for aqueous Zn-ion batteries
Source: Royal Society of Chemistry journal article supplement (doi:10.1039/d1ce01188j), 2021-01-01
Supplement: d1ce01188j1.pdf [file d1ce01188j1.pdf]

## Supporting Information

# VO<sub>2</sub>(B)@ Carbon Fiber Sheet as a Binder-free Flexible Cathode for Aqueous Zn-Ion Batteries

*Xiaofan Li*<sup>a, b</sup>, *Linyu Yang*<sup>a, b\*</sup>, *Hongyu Mi*<sup>c</sup>, *Huizhong Li*<sup>d</sup>, *Min Zhang*<sup>a, b</sup>, *Ablat Abliz*,  
<sup>a, b</sup> *Fengjun Zhao*<sup>d</sup>, *Shuying Wang*<sup>a, b\*</sup>, *Haibing Li*<sup>e</sup>

<sup>a</sup> Xinjiang Key Laboratory of Solid State Physics and Devices, Xinjiang University, Urumqi 830046, PR China. E-mail: yanglinyu0222@sina.com; wsysmilerr@sina.com.

<sup>b</sup> School of physics and technology, Xin Jiang University, Urumqi, Xinjiang 830046, China.

<sup>c</sup> School of Chemical Engineering and Technology, Xinjiang University, Urumqi 830046, China.

<sup>d</sup> School of Materials Science and Engineering, Central South University, Changsha, Hunan 410083, China.

<sup>e</sup> Xinjiang Uygur Autonomous Region Research Institute of Measurement and Testing, Urumqi 830011, China

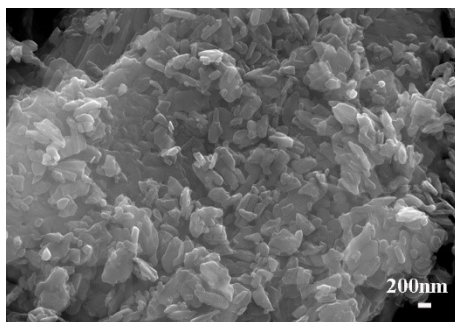

**Fig. S1** The SEM image of pure VO<sub>2</sub>(B) at magnification of 20,000 times.

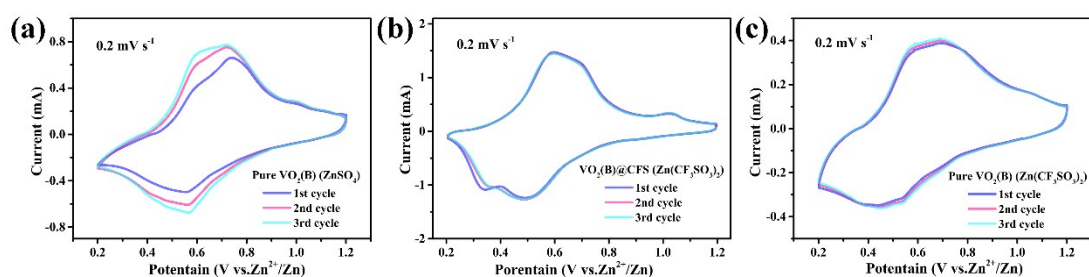

**Fig. S2** Electrochemical characterization : (a) CV curves of pure VO<sub>2</sub>(B) cathode at a voltage range of 0.2–1.2 V [ZnSO<sub>4</sub>]. (b) CV curves of VO<sub>2</sub>(B)@CFS cathode at a voltage range of 0.2–1.2 V [Zn (CF<sub>3</sub>SO<sub>3</sub>)<sub>2</sub>]. (c) CV curves of pure VO<sub>2</sub>(B) cathode at a voltage range of 0.2–1.2 V [Zn (CF<sub>3</sub>SO<sub>3</sub>)<sub>2</sub>].

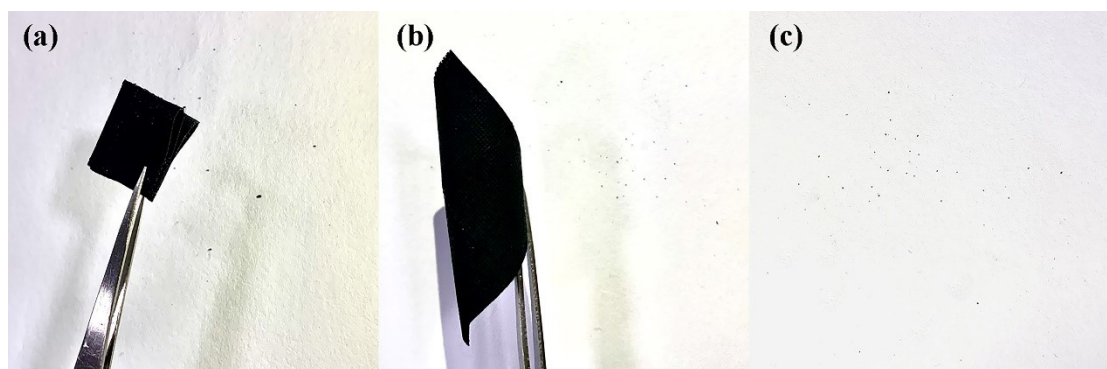

**Fig. S3** VO<sub>2</sub>(B)@CFS Flexible cathode electrode: (a) After being folded 30 times; (B) After being twisted 50 times; (c) Powder falling on A4 paper after 80 folds and twists.

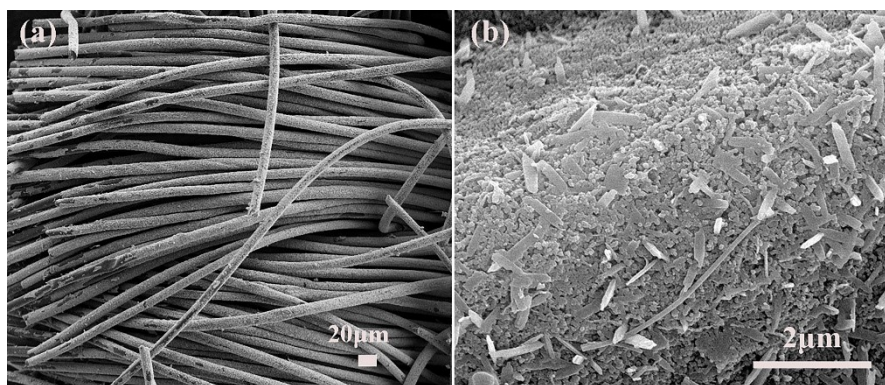

**Fig. S4** SEM image (a) and (b) of VO<sub>2</sub>(B)@CFS electrode after 50 cycles at 0.5A g<sup>-1</sup>.

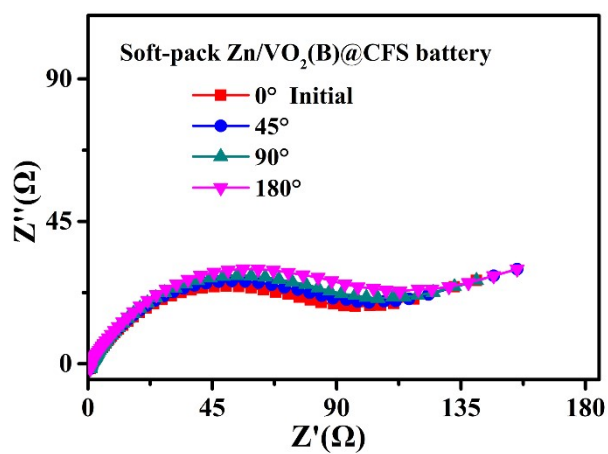

**Fig. S5** Electrochemical impedance spectra of the soft-packaged Zn/VO<sub>2</sub>(B)@CFS battery at various bending states from 0.01 Hz to 100 kHz .

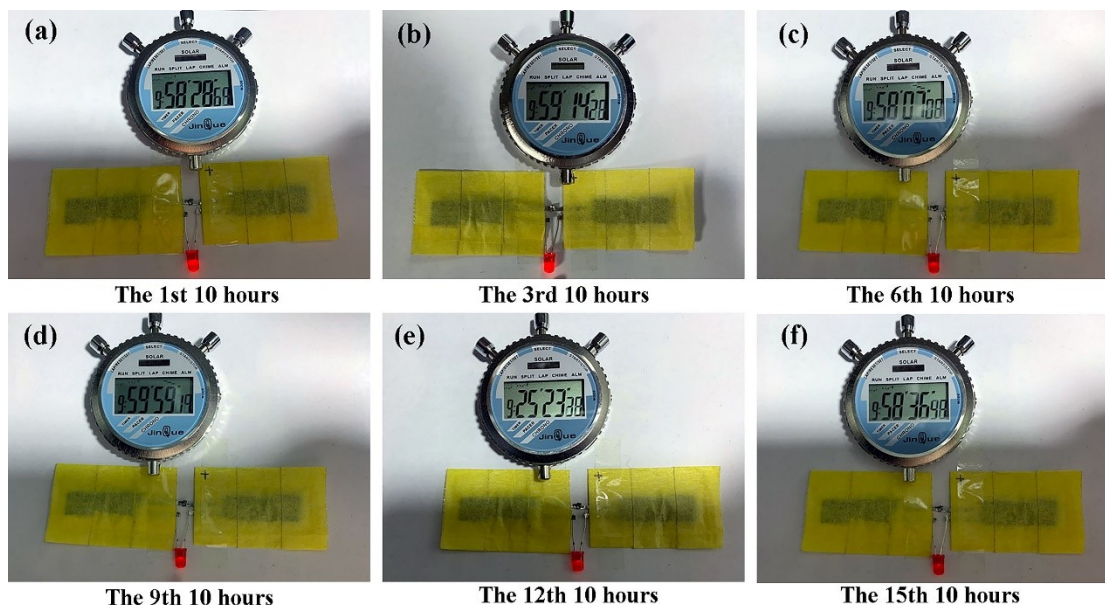

**Fig. S6** Soft-pack Zn/VO<sub>2</sub>@CFS[ZnSO<sub>4</sub>] battery powers LED lights brightness at 10 to 150 h.

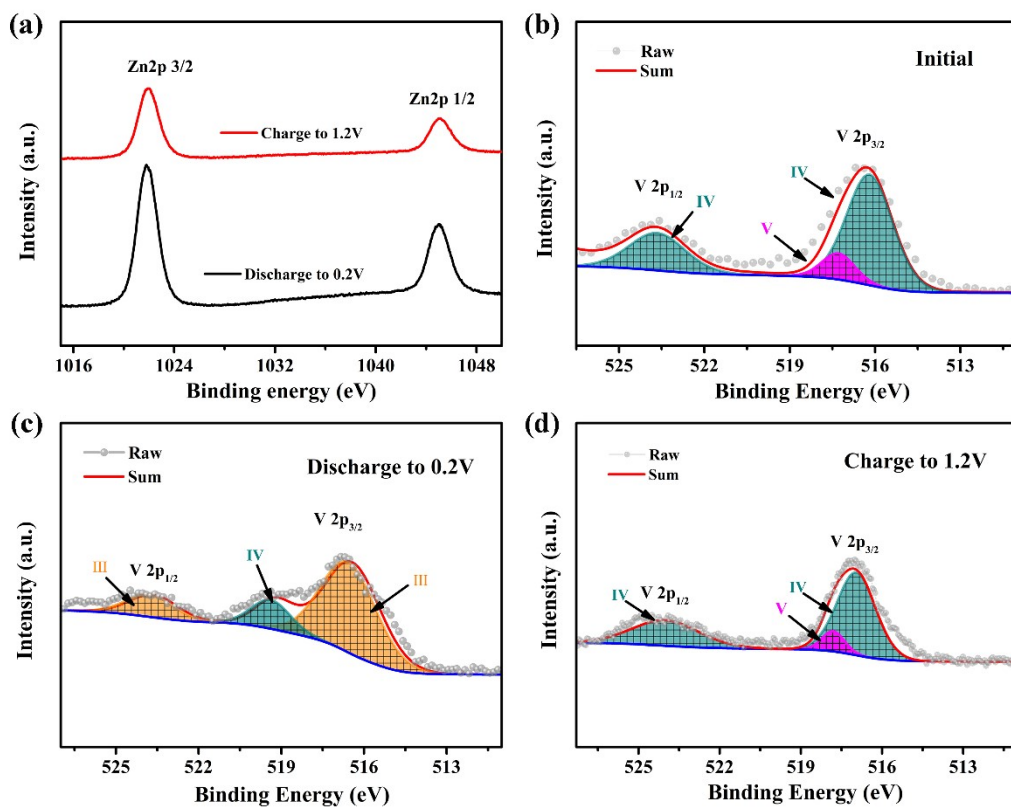

**Fig. S7** (a) Zn 2p XPS spectra at different charge/discharge voltages; (b–d) V 2p XPS spectra at initial, discharge and charge voltages.

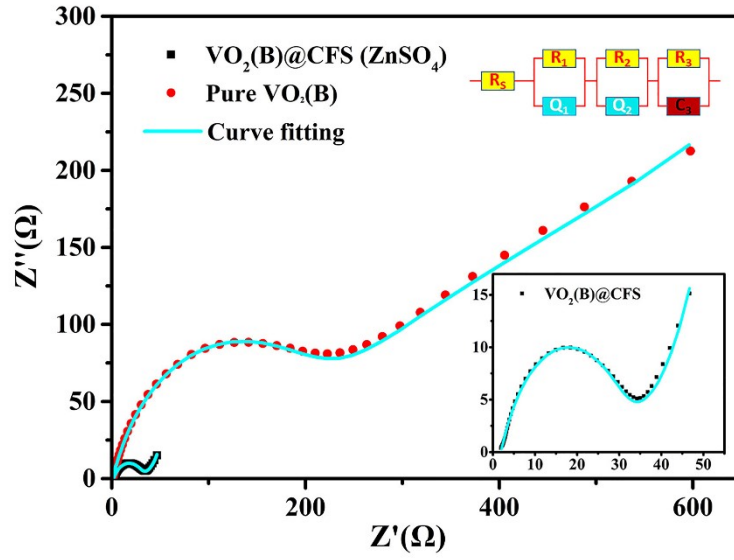

**Fig. S8** Comparison of EIS(electrochemical impedance spectroscopy) between CFS@ $\text{VO}_2(\text{B})$  and pure  $\text{VO}_2(\text{B})$  [ $\text{ZnSO}_4$ ].
